# Supplementary material for: Nursing Student Satisfaction with the Teaching Methodology Followed during the COVID-19 Pandemic
Source: MDPI journal article supplement (doi:10.3390/healthcare10040597), 2022-03-22
Supplement: s1 [file s1]

## SUPPLEMENTARY MATERIAL

| <b>Table S1.</b> Nursing students' satisfaction by dimensions and scale items with online and bimodal learning measured with adapted CUSAUF questionnaire |                                  |                             |          |
|-----------------------------------------------------------------------------------------------------------------------------------------------------------|----------------------------------|-----------------------------|----------|
| <b>Dimensions and scale items</b>                                                                                                                         | <b>Online learning Mean (SD)</b> | <b>B-learning Mean (SD)</b> | <b>p</b> |
| <b>Subjects structure</b>                                                                                                                                 | 2.61 (0.70)                      | 3.01 (0.58)                 | 0.001    |
| 1. The course's structure, contents and training objectives are in accordance with those established in the academic guide adapted to the new situation   | 2.77 (0.81)                      | 3.10 (0.63)                 | 0.001    |
| 2. The activities performed on the virtual platform have contributed to the understanding and application of the acquired knowledge                       | 2.34 (0.90)                      | 2.90 (0.74)                 | 0.001    |
| 3. The design and material provided for the subjects and the delivery dates of activities were correctly configured.                                      | 2.73 (0.89)                      | 3.05 (0.74)                 | 0.003    |
| <b>Teacher-related aspects (teaching performance)</b>                                                                                                     | 2.74 (0.59)                      | 2.94 (0.54)                 | 0.001    |
| 4. Teachers/lecturers presented the adapted contents of subjects clearly and in-depth, and explained them whenever necessary                              | 2.38 (0.88)                      | 2.93 (0.80)                 | 0.001    |
| 5. Teachers provided clear guidance about the rules to work on the virtual learning platform before and while subjects were underway                      | 2.61 (0.90)                      | 2.69 (0.90)                 | 0.524    |
| 6. Online digital educational resources and tools were suitably used by the teachers                                                                      | 2.66 (0.80)                      | 2.59 (0.81)                 | 0.507    |
| 7. Teachers mastered the themes worked on in subjects                                                                                                     | 2.86 (0.78)                      | 3.18 (0.74)                 | 0.002    |
| 8. Teachers correctly answered our concerns, doubts and technical difficulties with using the virtual platform and teaching tools outside class           | 2.73 (0.88)                      | 2.73 (0.79)                 | 0.990    |
| 9. The activities delivered by students were properly marked and obtained suitable feedback.                                                              | 2.99 (0.82)                      | 3.01 (0.78)                 | 0.871    |
| 10. Evaluating or marking course activities was objective and based on the criteria previously set by teachers                                            | 2.84 (0.87)                      | 3.17 (0.70)                 | 0.002    |
| 11. Teachers' feedback or remarks about students' performed activities were respectful, coherent and based on the previously set evaluation criteria.     | 2.95 (0.85)                      | 3.17 (0.70)                 | 0.046    |
| 12. Teachers encouraged students' participation and their collaborative work during the course by different means (forums, tutoring, etc.)                | 2.75 (0.85)                      | 2.96 (0.76)                 | 0.053    |
| <b>ASPECTS RELATED TO THE CONTENTS OF THE DIFFERENT SUBJECTS ON THE WHOLE</b>                                                                             | 2.60 (0.66)                      | 2.92 (0.54)                 | 0.001    |
| 13. The contents taught and the employed educational resources (documents, videos, illustrations) were up to date                                         | 2.72 (0.89)                      | 3.05 (0.77)                 | 0.003    |

|                                                                                                                                                                                 |             |             |       |
|---------------------------------------------------------------------------------------------------------------------------------------------------------------------------------|-------------|-------------|-------|
| 14. The employed educational resources (documents, videos, illustrations, etc.) were sufficient and suitable for profoundly dealing with the themes proposed during the course. | 2.51 (0.89) | 3.08 (0.67) | 0.001 |
| 15. The presented/taught contents were easy to understand.                                                                                                                      | 2.46 (0.79) | 2.89 (0.65) | 0.001 |
| 16. I think that the originality of the offered contents was suitable.                                                                                                          | 2.38 (0.88) | 2.60 (0.75) | 0.036 |
| 17. I think that the interest of contents from a practical point of view was suitable                                                                                           | 2.56 (0.97) | 2.89 (0.69) | 0.02  |
| 18. I think that contents were appropriate interesting.                                                                                                                         | 2.78 (0.89) | 3.04 (0.68) | 0.012 |
| 19. The relation between the objectives and the offered contents was suitable.                                                                                                  | 2.72 (0.90) | 3.05 (0.67) | 0.001 |
| 20. The relation between the schedule and the offered contents was suitable                                                                                                     | 2.52 (0.86) | 2.82 (0.84) | 0.008 |
| 21. The evaluation of contents (exams and tests) offered over the platform/s was objective and rigorous                                                                         | 2.73 (0.93) | 2.85 (0.87) | 0.306 |
| 22. I think that the scientific and didactic/educational quality of the offered contents was suitable                                                                           | 2.66 (0.76) | 3.00 (0.78) | 0.001 |
| <b>COMMUNICATION-RELATED ASPECTS</b>                                                                                                                                            | 2.91 (0.85) | 3.05 (0.63) | 0.147 |
| 23. I found that communicating with the teacher was easy by means of the available communication tools: email, forum, chat, video conferences, online classes, etc.             | 2.80 (0.93) | 3.00 (0.78) | 0.078 |
| 24 I found that communicating online with my other classmates in the environment was simple                                                                                     | 3.01 (0.94) | 3.11 (0.75) | 0.400 |
| <b>ASPECTS RELATED TO THE VIRTUAL LEARNING ENVIRONMENT</b>                                                                                                                      | 3.05 (0.64) | 3.04 (0.56) | 0.971 |
| 25. The technical functioning in the environment was easy to understand                                                                                                         | 3.04 (0.79) | 2.93 (0.80) | 0.305 |
| 26. I liked the available platforms/means because they were easy to browse                                                                                                      | 3.15 (0.81) | 3.21 (0.75) | 0.523 |
| 27. I think that the esthetic quality of the environment (size and type of fonts, colors, etc.) was suitable                                                                    | 3.31 (0.76) | 3.21 (0.64) | 0.266 |
| 28. The suitability of the different esthetic elements on platforms was appropriate (texts, images, graphs)                                                                     | 3.23 (0.76) | 3.14 (0.67) | 0.329 |
| 29. Platforms' response times (time to access a link, to gain access to different tools, etc.) were suitable                                                                    | 2.73 (0.91) | 3.01 (0.76) | 0.010 |
| 30. The environment's technical functioning (connection and work on platforms) was generally suitable                                                                           | 2.80 (0.92) | 2.73 (0.83) | 0.531 |
| <b>TOTAL SCORE</b>                                                                                                                                                              | 2.75 (0.56) | 2.94 (0.49) | 0.004 |
| Values are expressed as the mean with standard deviation in brackets and 95% confidence interval.                                                                               |             |             |       |

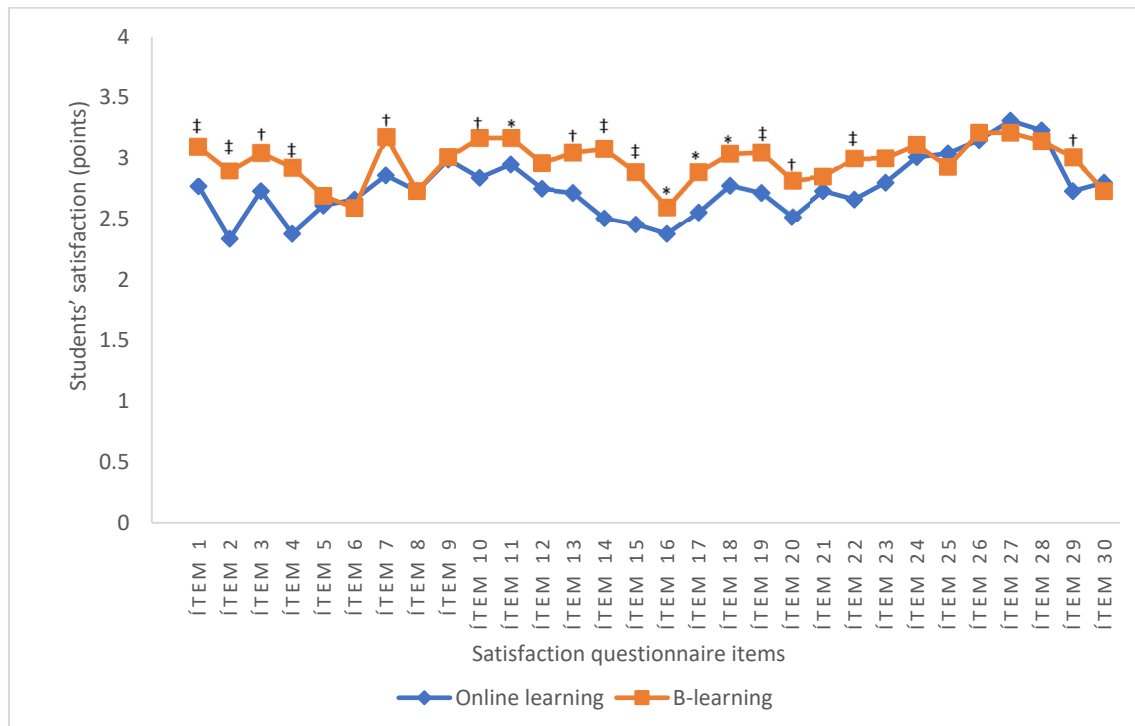

**Figure S1.** Students' satisfaction according to the survey item and learning methodology. \*  $p < 0,05$ ; †  $p < 0,01$ ; ‡  $p < 0,001$
